# Supplementary material for: Is achieving 7,000 steps/day cross-sectionally and prospectively associated with older adults’ lower-extremity performance?
Source: Research Square preprint supplement (doi:10.21203/rs.3.rs-38967/v2), 2020-12-11
Supplement: Supplementary file 1 [file 212033809dd50ab14e03a540.docx]

| **DEMOGRAPHIC CHARACTERISTICS QUESTIONNAIRE** |
| --- |

|  |
| --- |
| 1. What is your gender? |
| (1) Male (2) Female |
| 2. What is your age? |
| (1) 60-74 years (2) ≥ 75 years |
| 3. What is your height? |
| __________________ |
| 4. What is your weight? |
| __________________ |
| 5. What is the highest degree or level of school you have completed? |
| (1) Elementary school (2) Middle school (3) High school (4) University and above |
| 6. What is your current employment status? |
| (1) Full time job (2) Without full time job (e.g. volunteer, part-time) (3) Retired |
| 7. What is your current marital status? |
| (1) Married (2) Single (3) Divorced (4) Widowed (5) Refuse to answer |
| 8. What is your living status? |
| (1) Alone (2) With other |
| 9. How would you evaluate your overall health? |
| (1) Good (2) Poor |
| 10. Are you habituated to balanced diet? |
| (1) Yes (2) NO |
| 11. Are you habituated to smoke? |
| (1) Yes (2) NO |
| 12. Are you habituated to alcohol? |
| (1) Yes (2) NO |
| 13. Do you currently suffer from any diseases? |
| (1) No (2) Hypertension (3) Blood lipid levels (4) Diabetes depression |

**Thanks for your answer!**
